# 1 Reduced injury risk links sociality to survival in a group-living 2 primate

3 Melissa A. Pavez-Fox<sup>1,\*</sup>, Clare M. Kimock<sup>2,a</sup>, Nahiri Rivera-Barreto<sup>3</sup>, Josue E.  
4 Negron-Del Valle<sup>4</sup>, Daniel Phillips<sup>4</sup>, Angelina Ruiz-Lambides<sup>3,5</sup>, Noah  
5 Snyder-Mackler<sup>4,6</sup>, James P. Higham<sup>2</sup>, Erin R. Siracusa<sup>1,a</sup>, and Lauren J.N.  
6 Brent<sup>1,a,\*</sup>

7 <sup>1</sup>Centre for Research in Animal Behaviour, University of Exeter, Exeter, United Kingdom EX4  
8 4QG

9 <sup>2</sup>Department of Anthropology, New York University, New York, NY 10003

10 <sup>3</sup>Caribbean Primate Research Center, University of Puerto Rico, San Juan, Puerto Rico  
11 00936-5067

12 <sup>4</sup>Center for Evolution and Medicine, Arizona State University, Tempe, AZ 85281, United States

13 <sup>5</sup>Department of Human Behavior, Ecology and Culture, Max Planck Institute for Evolutionary  
14 Anthropology, Leipzig, Germany 04103

15 <sup>6</sup>School of Life Sciences, Arizona State University, Tempe, AZ 85281

16 <sup>a</sup>Current address: Department of Psychology, Nottingham Trent University, Nottingham, United  
17 Kingdom, NG1 4FQ

18 <sup>b</sup>Equal contribution

19 <sup>\*</sup>Corresponding authors. Emails: mp66@exeter.ac.uk, L.J.N.Brent@exeter.ac.uk

## 20 Abstract

21 Affiliative social relationships and high social status predict longer lifespans in many  
22 mammal species, including humans. Yet, the mechanisms by which these components  
23 of sociality influence survival are still largely unknown. Using 10 years of data and  
24 over 1000 recorded injuries from a free-ranging population of rhesus macaques (*Macaca*  
25 *mulatta*), we investigated two possible mechanisms that could underpin the relationship  
26 between sociality and survival: sociality (1) reduces injury risk; and/or (2) increases the  
27 probability of survival after an injury. We found that sociality can affect an individual's  
28 survival by influencing their risk of injury, but had no effect on the probability of injured  
29 individuals dying. Individuals with more affiliative partners experienced fewer injuries  
30 compared to less socially integrated. Social status was also associated with lower risk  
31 of injury, particularly for older high-ranking individuals. These results represent the  
32 first demonstration of a link between social integration and fatal injury risk in a group-  
33 living species, and are the first to link social status, injury risk and survival outside of  
34 humans. Collectively, our results offer insights into a mechanism that can mediate the  
35 well-known benefits of sociality on an individual's fitness.

36 Uncovering the means by which sociality influences lifespan is of major interest to evo-  
37 lutionary biologists, social scientists and biomedical researchers [1, 2, 3]. Evidence from  
38 humans and other animals has provided increasing support for the benefits of affiliative  
39 social interactions on survival. The strength of social bonds [4, 5, 6, 7], the number of weak  
40 connections [8], the number of associates [9, 10, 11], the number of relatives in a group  
41 [12] and the number of indirect connections [11, 13] predict the lifespan of individuals; the  
42 general pattern being that those with more social partners are the ones that live longer.  
43 Similarly, socioeconomic status in humans and social status in other animals are also robust  
44 predictors of mortality risk [14, 15, 12, 5, 16, 17] with lower status individuals suffering a  
45 greater risk of death. But precisely how the social environment affects survival is less well  
46 understood.

47 One way for sociality to influence survival is by mitigating the costs of contest com-  
48 petition over resources. Dominance hierarchies, for instance, are believed to have evolved  
49 to reduce direct costs associated with competition for resources [18]. Nevertheless, social  
50 hierarchies still usually entail disparities in access to resources, with individuals higher in  
51 the hierarchy having priority access to food and mates at the expense of their subordinates  
52 [19], who may still need to compete for access. Affiliative partners can also help to re-  
53 duce engagement in agonistic encounters by providing access to resources via cooperation  
54 and social tolerance [20]. For example, food sharing, cooperative feeding and co-feeding  
55 have been described in several mammals, including some species of bats [21], cetaceans  
56 [22, 23, 24], monkeys [25, 26] and apes [20]. Affiliative partners can also help to deter phys-  
57 ical aggression from conspecifics by providing agonistic support. For instance, affiliative  
58 interactions predict the formation of coalitions in male and female African wild dogs (*Ly-*  
59 *caon pictus*) [27], Camargue horses (*Equus caballus*) [28], macaques (*Macaca spp.*) [29, 30]  
60 and chimpanzees (*Pan troglodytes*) [31]. Agonistic support has also been widely documented  
61 in female-philopatric primate species where related females defend one another [32, 33, 34].  
62 If social status or affiliative relationships reduce the chance of aggressive interactions, these  
63 components of sociality may directly enhance survival by allowing individuals to avoid costly  
64 outcomes, such as injuries.

65 In addition to mitigating the immediate costs of aggressive behaviors, sociality may  
66 also enhance survival through buffering mechanisms that influence an individual's health.  
67 Differences in access to resources according to social status, for instance, may determine  
68 the general body condition and health of individuals. Low social status has been related  
69 to higher disease risk [15], higher levels of inflammation [35, 36], reduced healing capacity  
70 [37] and overall impaired health in several mammal species, including humans [38, 39, 3].  
71 Affiliative partners, on the other hand, can be valuable resources that can contribute to  
72 better health by providing access to food [40, 41] and reducing the burden of infections via  
73 hygienic behaviors (*i.e.*, grooming) [42, 43]. Better health status for high ranking or socially  
74 integrated individuals may translate into higher chances of survival in the face of adversity,  
75 for example, by improving the chances of healing following an injury.

76 Yet despite clear hypotheses for the potential mechanisms by which social status and af-  
77 filiative relationships influence lifespan, there remains a lack of empirical evidence for these

78 mechanisms affecting survival. For example, several studies have shown associations be-  
79 tween individual variation in sociality with markers of health and immunity [44, 45, 35, 36],  
80 yet the consequences of such differences in the face of naturally occurring challenges to  
81 health, and the downstream impact those differences might have on survival are unknown.  
82 Similarly, studies supporting a relationship between sociality and lifespan usually do not  
83 have the detailed physiological or health data required to test potential mechanisms con-  
84 necting the two [1]. To fill this gap, we use a long-term data set containing both survival  
85 data and detailed information on injuries in a free-living population of rhesus macaques to  
86 test whether sociality mitigates the costs of competition (*i.e.*, injuries) and its consequence  
87 on survival.

88 We explore two injury-related mechanisms that can link sociality with survival. Specif-  
89 ically, we test whether social status and/or affiliative relationships: 1) influence the risk  
90 of being injured, and/or 2) alter an individual’s survival trajectory after an injury (Fig.  
91 1). We did so using 10-years of injury data collected *ad-libitum* together with demographic  
92 information from male and female rhesus macaques aged 4-29 years living on Cayo Santiago  
93 island, Puerto Rico. Rhesus macaques live in multi-male multi-female despotic societies,  
94 where access to resources is highly determined by an individual’s position in the dominance  
95 hierarchy [46]. Previous studies have shown the benefits of affiliative partners and social  
96 status on the survival probability of monkeys in this population [12, 14, 8]. Predators are  
97 absent from the island, ensuring injuries are mostly the result of physical aggression be-  
98 tween conspecifics. Rhesus macaques are seasonal breeders with a mating season that can  
99 last from 3 to 6 months. During these periods both affiliative and agonistic interactions are  
100 usually heightened [47, 48] and, thus, important trade-offs between health, reproduction  
101 and survival may occur [49, 50].

102 Because our study hinged on the assumption that being injured was detrimental for  
103 survival in this population we first tested whether injuries inflicted by conspecifics increased  
104 the probability of death in these animals (Fig 1; red arrow). To test if sociality influences the  
105 risk of injury (mechanism 1), we asked whether social status and the number of affiliative  
106 partners were associated with an individual’s injury risk (Fig 1; yellow arrow). Given  
107 the protective role of high social status and importance of affiliative partners in deterring  
108 aggression [20, 32, 18], we predicted that high status individuals and those with more  
109 affiliative partners would have a lower risk of injury. To test if sociality can alter the  
110 impact of injuries on survival (mechanism 2), we asked if social status and the number  
111 of affiliative partners affected the survival trajectories of injured individuals (Fig 1; green  
112 arrow). As both social status and social integration can determine differences in health  
113 status that may affect healing rates [39, 37, 51], we predicted that high status animals and  
114 those with more affiliative partners would have a lower hazard of death from an injury than  
115 low status individuals or those with fewer affiliative partners. Our results demonstrate that  
116 sociality plays an important role in mediating the risk of injury, offering one of the few clear  
117 mechanistic links between sociality and survival in a non-human mammal to date.

## 118 Results

### 119 Effect of injuries on survival

120 To quantify the extent to which injuries affect an individual's survival we used time-  
121 dependent mixed effects cox models [52, 53]. Animals that were injured were nearly three  
122 times more likely to die in the two months following the injury compared to animals that  
123 were not injured (Fig. 2A; Hazard (Hz) =  $1.06 \pm 0.17$  (SEM),  $z = 6.58$ ,  $p < 0.01$ , injuries  
124 (i) = 1041, deaths (d) = 443, N injured = 571, N uninjured = 1030), independent of their  
125 sex or the reproductive season when the injury occurred. Individuals that were severely  
126 injured (*e.g.* broken bones, exposed organs, multiple wounds or wounds in vital areas, see  
127 SI Materials and Methods for details) experienced even a higher hazard of death that was  
128 dependent on sex (Hz severity\*sexM =  $1.46 \pm 0.72$ ,  $z = 2.02$ ,  $p = 0.04$ , i = 398, d = 107,  
129 N severely injured = 295). In males, severe injuries were associated with a higher chances  
130 of dying compared to non-severe injuries, while in females, severe and non-severe injuries  
131 had similar hazards of death (Fig. 2B).

### 132 Mechanism #1: Sociality affects the risk of injury

#### 133 Effect of social status on injury risk

134 To test if high status animals were less likely to be injured or severely injured than low status  
135 ones, we compared their injury risk separately for males and females using logistic models.  
136 Given that observations of social interactions were only available for a subset of our subjects,  
137 we used proxies of social status previously used in female (matrilineal rank) [14, 12] and  
138 male rhesus macaques (group tenure length) [54, 55, 56] to maximize our statistical power.  
139 We found that social status in females had a strong effect on the likelihood of being injured,  
140 which was dependent on an individual's age (Odds rankLow\*age =  $0.3 \pm 0.1$ ,  $z = 3.02$ ,  $p <$   
141  $0.01$ , i = 448, N = 827). Low status females had a higher probability of being injured than  
142 high status females, and this probability increased with a female's age (Fig. 3A). Social  
143 status had no relationship with the risk of severe injuries in females (Odds =  $0.13 \pm 0.2$ ,  $z$   
144 =  $0.65$ ,  $p = 0.5$ , i = 135, N severely injured = 114). In males, social status also had a strong  
145 effect on the probability of being injured which was dependent on age (Odds status\*age =  
146  $0.1 \pm 0.03$ ,  $z = 3.28$ ,  $p < 0.01$ , i = 536, N = 748). In younger males, lower social status  
147 was associated with a higher incidence of injuries, while at older ages high status males  
148 had higher probability of being injured (Fig. 3B). The same pattern was observed when  
149 we focused our analysis on severe injuries (Fig. S2A, Odds status\*age =  $0.12 \pm 0.04$ ,  $z =$   
150  $2.67$ ,  $p < 0.01$ , i = 245, N severely injured = 168). Consistent with heightened male-male  
151 competition over females [48] and with male harassment of females during the reproductive  
152 season [57], we also found that injury-risk increased for both males and females during  
153 the mating period compared to outside it, independent of their social status (injury: Odds  
154 females =  $0.85 \pm 0.28$ ,  $z = 3.02$ ,  $p < 0.01$ ; Odds males =  $1.2 \pm 0.26$ ,  $z = 4.6$ ,  $p < 0.01$ ;  
155 severe injury : Odds females =  $1.04 \pm 0.26$ ,  $z = 4$ ,  $p < 0.01$ ; Odds males =  $1.38 \pm 0.25$ ,  $z$   
156 =  $5.4$ ,  $p < 0.01$ ) .

## 157 **Effect of affiliative partners on injury risk**

158 To test whether animals with more affiliative partners were less likely to be injured or  
159 severely injured than those with fewer affiliative partners we used logistic models. To  
160 support robust statistical analyses, we relied on a proxy (*i.e.*, number of female relatives  
161 in the group) that has been previously shown to influence survival in this population [12].  
162 Female rhesus macaques have a strong bias toward forming partnerships with their maternal  
163 kin [58] and this proxy has been positively correlated with network measures of social  
164 integration [59]. Males, on the other hand, are the dispersing sex and have few kin in their  
165 new groups, and so were excluded from this analysis. We found that the number of close  
166 relatives (relatedness coefficient ( $r$ ) = 0.5, *i.e.*, mother-daughters and full siblings) in a  
167 female's group had a weak, but not significant, effect on her probability of being injured  
168 (Odds =  $-0.1 \pm 0.05$ ,  $z = -1.84$ ,  $p = 0.06$ ,  $i = 491$ ,  $N = 851$ ). However, the size of a female's  
169 extended family ( $r \geq 0.125$ , *i.e.*, spanning three generations) was strongly associated with  
170 the likelihood of injury, with females experiencing a 13% reduction in the incidence of  
171 injuries for every one standard-deviation increase in their number of female relatives (Fig.  
172 4A; Odds =  $-0.14 \pm 0.06$ ,  $z = -2.5$ ,  $p = 0.01$ ,  $i = 491$ ,  $N = 851$ ). The incidence of severe  
173 injuries was not affected by the number of close relatives (Odds =  $-0.06 \pm 0.09$ ,  $z = -0.6$ ,  
174  $p = 0.53$ ,  $i = 147$ ,  $N$  severely injured = 123) nor by the size of a female's extended family  
175 (Odds =  $-0.13 \pm 0.09$ ,  $z = -1.36$ ,  $p = 0.18$ ,  $i = 147$ ,  $N$  severely injured = 123).

## 176 **Mechanism #2: Sociality influences the survival of injured animals**

### 177 **Effect of social status on survival of injured animals**

178 To assess whether social status or affiliative relationship buffer the detrimental effect of in-  
179 juries on survival, we used time-dependent mixed effects cox models. We found no evidence  
180 of a buffering effect of social status on the survival of injured females (Hz injured\*rankLow  
181 =  $-0.45 \pm 0.46$ ,  $z = -0.98$ ,  $p = 0.33$ ,  $i = 448$ ,  $d = 103$ ,  $N = 278$ ) or injured males (Hz in-  
182 jured\*tenure =  $0.00009 \pm 0.0002$ ,  $z = 0.47$ ,  $p = 0.64$ ,  $i = 536$ ,  $d = 97$ ,  $N = 272$ ). Similarly,  
183 no buffering effect of social status on survival was observed in severely injured females (Hz  
184 injured\*rankLow =  $-0.51 \pm 0.92$ ,  $z = -0.55$ ,  $p = 0.58$ ,  $i = 135$ ,  $d = 42$ ,  $N$  severely injured  
185 = 114) or males (Hz injured\*status =  $-0.0001 \pm 0.0002$ ,  $z = -0.67$ ,  $p = 0.5$ ,  $i = 245$ ,  $d =$   
186  $57$ ,  $N$  severely injured = 168).

### 187 **Effect of affiliative partners on survival of injured animals**

188 We found no evidence for a relationship between survival after an injury and the number  
189 of close relatives a female had available at the time (Hz injured\*nkin =  $-0.22 \pm 0.28$ ,  $z =$   
190  $-0.78$ ,  $p = 0.43$ ,  $i = 491$ ,  $d = 114$ ,  $N = 294$ ) or current size of her extended family (Hz  
191 injured\*nkin =  $0.03 \pm 0.04$ ,  $z = 0.59$ ,  $p = 0.56$ ,  $i = 491$ ,  $d = 114$ ,  $N = 294$ ). Similarly, the  
192 number of affiliative partners did not influence the survival of severely injured females (Hz  
193 close kin =  $-0.82 \pm 0.68$ ,  $z = -1.21$ ,  $p = 0.23$ ; Hz extended family =  $0.008 \pm 0.09$ ,  $z = -0.1$ ,  
194  $p = 0.92$ ;  $i = 147$ ,  $d = 45$ ,  $N$  severely injured = 123).

## 195 Post hoc mediation analysis

196 Mediation analyses can be used to test the significance of a mediator in the relationship  
197 between an independent and a dependent variable and to measure the effect size of that  
198 relationship [60]. Although useful, current mediation analysis approaches are unable to  
199 estimate effect sizes for data structured in a logistic manner, such as ours, nor are they  
200 able to cope with interaction terms in logistic regressions [61]. Given these limitations, we  
201 could not use mediation analysis to evaluate if the effect of social status on survival was  
202 mediated by injury risk because these results relied on an interaction with individual age  
203 (Fig. 3), nor could we use it to estimate the effect size of any of our results. We did,  
204 however, use mediation analysis to assess if injury risk significantly mediated some of the  
205 effect of affiliative partners on survival. Our mediation analysis confirmed a direct effect  
206 of affiliative partners on survival by showing that the size of a female's extended family  
207 significantly reduced her hazard of death (direct effect =  $-0.065 \pm 0.02$ ,  $z = -3.19$ ,  $p <$   
208  $0.01$ ). It also confirmed that this relationship was significantly mediated by the risk of  
209 being injured (indirect effect  $z$ -score =  $-2.31$ ,  $p < 0.05$ ).

## 210 Discussion

211 Taken together, our results suggest that different components of the social environment  
212 can modulate the risk of suffering an injury and, therefore, the hazard of death. We found  
213 that high social status was associated with a lower injury risk for specific periods of males'  
214 and females' lives, and that a female's number of affiliative partners may help to prevent  
215 injuries. In contrast to previous research showing that individuals with higher social status  
216 had faster healing rates [37], we found that none of the measures of sociality analyzed  
217 affected the survival trajectories of injured animals.

218 To our knowledge, this is the first field study to quantify the consequences of injuries  
219 on the probability of death in a nonhuman primate. Other studies in wild populations  
220 of baboons (*Papio sp.*) and Afro- Eurasian monkeys have established the social and demo-  
221 graphic predictors of injury risk [62, 37, 63, 64, 65, 66], yet its consequences on survival  
222 have yet to be shown. We found sex-differences on the influence of severe injuries in survival  
223 that can reflect trade-offs between the energy allocated for reproduction versus immunity  
224 [4, 37]. For instance, during the reproductive season the probability of being severely injured  
225 was substantially higher for both sexes. During this period, males may be particularly  
226 immunocompromised given the high amount of energy and resources required to sustain  
227 the effort associated with mating [49, 67], which can impair injury recovery. On the other  
228 hand, females usually have higher demand on their immune systems during lactation [4, 68],  
229 *i.e.*, outside the reproductive season. Therefore, females may cope better than males with  
230 severe injuries during the reproductive season at the expense of being more susceptible to  
231 the consequences of injury outside this period.

232 We found support for one of the hypothesized mechanisms linking sociality to survival,  
233 whereby sociality reduces an individual's risk of injury. High social status animals were



234 injured less than those of lower status during specific periods of their life, and females  
235 with more affiliative partners (i.e., kin) were less likely to be injured than less integrated  
236 females and, thus, experienced lower hazard of death. Our results linking social status to  
237 reduced risk of injury are consistent with the skewed access to resources in systems with  
238 clear linear dominance hierarchies [19]. High status individuals may not need to engage  
239 in costly aggression for food or mates, in contrast to low status animals who must gain  
240 access through contests. Although we could not test for a mediation effect of injury risk  
241 on the relationship between social status and survival, our results suggest that low status  
242 individuals experience greater hazard of death as a result of enhanced risk of injury. Our  
243 finding that social status did not influence the risk of injury in young females may be  
244 because at younger ages females' relative positions in the dominance hierarchy have yet to  
245 be fully established [69]. Further, we showed that older high status males were more likely  
246 to be injured than older low status males. This finding may reflect heightened aggressive  
247 challenges from lower status animals to those higher in the hierarchy as a consequence of  
248 a decline in the body condition with age [70] and, thus, the capacity of older high status  
249 males to maintain their dominance.

250 Previous studies in matrilineally-structured primate species, in which most of the affil-  
251 iative relationships are with female relatives, have shown that females commonly engage in  
252 agonistic encounters to support and protect their kin [32, 33, 34], even when confronting  
253 higher status individuals [71]. In line with these studies, our results suggest that having  
254 more relatives available may provide a numerical advantage to deter physical aggression.  
255 Other mechanisms, such as social tolerance when accessing resources [20] could also explain  
256 fewer injuries in the presence of more affiliative partners. Interestingly, only the size of a  
257 female's extended family, not her number of close relatives, had a significant relationship  
258 with risk of injury. This suggests that the number of close relatives in a group (range in our  
259 study: 0-5) may not be enough to provide robust agonistic support or access to resources,  
260 compared to the size of a female's extended family (range in our study: 0 - 38).

261 We found no support for the second hypothesized mechanism that we explored to link  
262 sociality to survival; none of the measures of sociality analyzed influenced an individual's  
263 survival trajectory following injury. Despite a vast body of literature supporting differ-  
264 ences in health and immunity between individuals of different social status [44, 35, 39],  
265 we found no evidence for an effect of social status on the survival trajectories of injured  
266 animals. These findings contrast with a previous study on wild baboons where high status  
267 males had faster healing rates than lower status males [37]. Although we did not quan-  
268 tify differences in healing times, our results suggest that the probability of recovering from  
269 an injury was not influenced by an animal's position in the dominance hierarchy. These  
270 differences might be explained in part by differences in features of the two study systems.  
271 Animals on Cayo Santiago are provisioned with food on a daily basis and access to the nu-  
272 trients needed to support immune function might not be as skewed as they are in the wild  
273 [45]. Notwithstanding, in both systems high social status has been associated with elevated  
274 levels of glucocorticoids and androgens [72, 73, 50], well known immune-suppressors, which  
275 suggest that in the Cayo Santiago population, unlike the baboons, the benefits of being of

276 high status may not outweigh the costs in terms of injury recovery.

277 We also found, contrary to our predictions, that the benefits associated with affiliative  
278 partners, such as feeding tolerance [74, 75] and social hygienic behaviours [42, 43], seem  
279 not to have helped females to cope with the detrimental effect of injuries on their survival.  
280 It is possible that social hygienic behavior, such as removal of ectoparasites by grooming,  
281 have long-term health benefits but do nothing to enhance the short-term immune response  
282 required to heal damaged tissue [76]. Additionally, grooming wounded areas may, in fact, be  
283 detrimental for the healing process as it could lead to the removal of protective scabs [43].  
284 This could be one reason why females with more affiliative partners, who are presumed  
285 to receive more grooming and to have more access to food via social tolerance, did not  
286 have improved survival trajectories after an injury. Previous research on this population  
287 has shown that the number of close relatives and the size of a female's extended family  
288 are associated with increased survival probability [12, 8]. The results of the current study  
289 suggest this relationship does not come about because of the reduced risk of death from  
290 injury. Further research is needed to elucidate to what extent other mechanisms involving  
291 health differences (e.g., disease susceptibility) play a role in the benefits of social partners  
292 in the survival of females in this population. Additionally, direct behavioral observations  
293 in a large sample of individuals with paired injury data will be required to explore refined  
294 ego-networks characteristics and to expand these results to affiliative relationships of males  
295 and unrelated females.

296 In sum, our study provides evidence for a mechanism linking sociality to lifespan. Grow-  
297 ing literature has supported a strong relationship between the social environment and sur-  
298 vival in many mammal species [3], but the ultimate function of some components of sociality,  
299 such as social relationships, remain unclear [77]. Although sociality has been demonstrated  
300 to enhance health and immunity [44, 35, 45], here we showed that these benefits did not  
301 translate to an improved ability to cope with the risk of death from injuries. Instead, we  
302 found that sociality plays an important role in preventing individuals from suffering injuries  
303 that would likely lead to death. Given how rare injuries are in this population, we do not  
304 expect that this is the only mechanism linking sociality to survival. Other mechanisms may  
305 include sociality-mediated differences in components of health related to disease suscepti-  
306 bility. In wild animal populations, social partners may also help with predator detection  
307 [78], predator mobbing [79], finding food sources [80], thermoregulation [81], among other  
308 possibilities. Nevertheless, here we provide rare empirical evidence for an ultimate function  
309 of social relationships, showing one mechanism by which high status and socially integrated  
310 individuals live longer. Demonstrating the relative importance of different mechanisms  
311 linking sociality and survival will be challenging but a crucial goal of future research. Our  
312 study provides insight into the essential role that long-term datasets that combine both  
313 demographic and health data will play in meeting this challenge.



## 314 **Materials and Methods**

### 315 **Subjects**

316 We studied a population of free-ranging rhesus macaques on the island of Cayo Santiago  
317 in Puerto Rico. The island is home to a population of  $\sim 1800$  individuals living in 6-10  
318 mixed sex naturally formed social groups. The field station is managed by the Caribbean  
319 Primate Research Center (CPRC), who monitor the population daily, and maintain the  
320 long-term ( $>75$  years) demographic database including data on births, deaths, social group  
321 membership for all animals and a genetic parentage database for animals born after 1992  
322 [82]. Animals have *ad-libitum* access to food and water, the island is predator-free and  
323 there is no regular medical intervention for sick or wounded individuals. We focused on all  
324 subadult and adult females and males between 4 and 29 years of age that were alive between  
325 the years 2010 and 2020, a period for which records on injuries exist (see below for details  
326 on how injury data was collected). In this study we included data on 571 injured individuals  
327 (294 females, 277 males) and 1030 uninjured individuals (557 females, 473 males). From  
328 these animals, 342 (85 injured, 258 uninjured) were removed from the population by the  
329 CPRC for population control purposes [83]. For all individuals, birth dates were known  
330 within a few days. Removal dates were known for all removed individuals. Dispersal from  
331 the island almost never occurs, therefore death dates were also known within a precision of  
332 a few days.

### 333 **Observation of injuries**

334 From 2010 to 2020 CPRC staff collected *ad-libitum* observations on the incidence and re-  
335 covery of injuries, during the daily monitoring of social groups for demographic purposes.  
336 Monkeys were individually recognized based on their identity tattoos located on their chest  
337 and leg. Whenever a staff member noticed a wounded animal or an animal displaying signs  
338 of injury (*e.g.* bleeding, limping), they recorded the animal ID, type of injury and addi-  
339 tional details on the general state of the animal (*e.g.* by evidence of weight loss or poor  
340 physical condition). If there was a visible wound, observers additionally recorded the area  
341 of the body affected, if it was a recent or old wound based on the presence of scars, and  
342 whenever possible, an estimate of its size. Observers updated the records every time they  
343 encountered the injured animal during their daily census routine with an average update  
344 time for an injured individual across the 10 years of 42.17 days. In total, 1137 injury events  
345 were observed with an average of  $107.6 \pm 63.5$  per year. Here, we included all the records  
346 of injuries that were considered non-ambiguous (*i.e.*, those with visible damage to the skin)  
347 including bites, scratches, cuts and abrasions along with other clearly observable injuries  
348 such as fractures and exposed organs. Our final sample consisted of 1041 injuries collected  
349 from September 2010 to April 2020. We classified these injuries based on their degree of  
350 severity, where severe injuries were those involving broken bones, exposed organs, multiple  
351 wounds and any wound in vital areas, including head, neck, abdomen or genitalia ( $n =$   
352 398). All other injuries were considered non-severe ( $n = 643$ ).

### 353 Measures of sociality

354 We used proxies of social status (dominance rank) in our analyses. Observations of agonistic  
355 interactions between pairs of animals- from which dominance rank is often computed- were  
356 only available for a subset of subjects (194 unique individuals injured in 292 injury events,  
357 485 uninjured individuals). To maximize statistical power, we decided to use the complete  
358 dataset and to use known proxies of social status instead; group tenure in males [54, 55, 56]  
359 and matrilineal rank in females [14, 12]. Male rhesus macaques reach dominance through  
360 queuing [84]; those that have been in a group for longer are usually high-ranking [54]. We  
361 determined tenure length using information on monthly social group membership. Group  
362 tenure length was computed as the time (in days) a male has been observed in his current  
363 group at the date of interest (current date minus date of dispersal). If a male had not yet  
364 dispersed and remained in his natal group, we computed group tenure since their birth date.  
365 If a male died or was removed from the population before the end of the period of interest,  
366 we computed group tenure up to that point. We established tenure length for all the males  
367 in our dataset ( $n = 750$ ,  $n$  injuries = 550). However, 67 of those males had periods where  
368 they were observed living outside a social group (*i.e.*, they were “extra-group”). These  
369 specific periods when group tenure could not be computed were dealt differently depending  
370 on the analysis in question and we discuss this on a case-by-case basis below.

371 Female rhesus macaques are philopatric and form maternally inherited stable linear  
372 dominance hierarchies whereby daughters occupy a rank just below their mothers [85].  
373 Members of a same matriline tend to be adjacent to one another in the hierarchy, thus  
374 the rank of an entire matriline can be used as a proxy for individual rank in social groups  
375 containing more than one matriline [14]. We determined matrilineal rank using known social  
376 status based on pairwise agonistic interactions from females in our dataset. We identified  
377 only one matriline per group as ‘high-ranking’- the one containing the alpha female - while  
378 all the others in the group were classed as ‘low-ranking’. Females in groups with a single  
379 matriline were disregarded as rank is a relative measure and females from groups with a  
380 single matriline are all of the same rank. We established matrilineal rank for 827 females  
381 (407 high ranking, 420 low ranking,  $n$  injuries = 448).

382 To confirm that group tenure and matrilineal rank were appropriate proxies for social  
383 status we looked at the correlation between dominance rank computed from animals with  
384 known social status based on agonistic interactions and our proxies. The correlation be-  
385 tween group tenure and dominance rank- measured as the percentage of same-sex animals  
386 outranked in the group [86] - was moderate and significant (Fig. S1A; *Pearson's r* = 0.62,  
387  $p < 0.01$ ). Matrilineal rank and categorical dominance rank were strongly correlated (high-  
388 ranking:  $\geq 80\%$  outranked, low ranking:  $\leq 79\%$  outranked [87]) based on Cramer's V  
389 coefficient (Fig. S1B; *Cramer's V* = 0.39, chi-square = 159.42,  $p < 0.01$ ), which measures  
390 the association between two categorical variables [88].

391 As above, we only had data on affiliative interactions for a subset of our subjects.  
392 Therefore, to maximize our sample size we followed a previous study [12] and used the  
393 number of female relatives (4 years and older) that were present in a female's social group  
394 as a proxy for social capital. Female rhesus macaques preferentially interact with their

395 female kin compared to non-kin individuals [58], thus those with greater number of relatives  
396 are expected to have more opportunities for social support. We limited this approach to  
397 females as males, being the dispersing sex, often have very few close kin in their new groups,  
398 and might not be able to recognise unfamiliar kin [89]. Using the Cayo genetic pedigree  
399 database we computed the number of close kin ( $r = 0.5$ ) and extended family ( $r \geq 0.125$ )  
400 for all injured and uninjured females in our dataset ( $n = 851$ ,  $n$  injuries = 491). We  
401 decided to test these two levels of relatedness as the first represents the strongest kin-bias  
402 (*i.e.*, mother-daughter or full sisters) and the second the lowest threshold for kin bias in  
403 affiliative interactions for rhesus macaques [90].

#### 404 **Statistical approach**

405 For all of the statistical analyses we defined a two-month time window (hereafter, bimonthly  
406 interval) as the period from which the injury status could transition from injured to not  
407 injured based on the average update time for an injured animal (*i.e.*, average time between  
408 two consecutive records) and the computed average healing time. Thus, all variables were  
409 evaluated on a bimonthly basis (*i.e.*, each row in the dataset represents a two-month inter-  
410 val). For each of the questions we ran two models, one that included injury status based on  
411 all injuries (model 1) and other that included injury status for severe injuries only (model  
412 2).

#### 413 **Effect of injuries on survival**

414 To establish the effect of injuries on survival we used time-dependent Cox proportional  
415 hazard (PH) models [52]. For the analyses we used the whole dataset ( $n = 1061$ ), including  
416 injured and uninjured animals from both sexes. Animals that were removed from the  
417 population or that were still alive at the end of the study period were censored. The  
418 predictor of interest was the injury status (*i.e.*, all injuries or severe injuries) along with  
419 other relevant variables that may influence survival probability, such as reproductive season  
420 (*i.e.*, mating vs no-mating) and sex. Age was accounted for implicitly in the models.  
421 Additionally, we included random effects for the specific bimonthly interval within the  
422 study period to control for potential mortality sources at the population level and individual  
423 identity to account for repeated measures. To determine the bimonthly interval we divided  
424 the whole study period (10 years) in intervals of two months- ranging from 1 to 58 - where  
425 1 represents the first two months since September 2010. We tested for interaction effects  
426 among our predictors and only retained them if statistically significant to avoid issues of  
427 overfitting.

#### 428 **Mechanism #1: Sociality affects the risk of injury**

429 To assess the effect of social status and the number of affiliative partners on the risk of  
430 injuries, we used generalized linear mixed models with binomial distribution (logit models).  
431 In all the models we asked whether our measures of sociality influenced the probability of

432 being injured in a given bimonthly interval. To test if high status animals were less likely  
433 to be injured compared to low status ones, we ran the analyses separately for each sex ( $n$   
434 females = 827,  $n$  males = 750). For males, social status was estimated from group tenure  
435 computed up to the end of each bimonthly interval. Bimonthly intervals where males were  
436 extra-group and so group tenure could not be computed, were excluded. For females, we  
437 used matrilineal rank, which remains constant across the lifespan and, thus, remained the  
438 same in every interval. To test if animals with more affiliative partners were less likely  
439 to be injured compared to animals with social partners we used only females ( $n = 851$ ),  
440 fitting separate models for the two thresholds of relatedness (close kin and extended family).  
441 The number of relatives present in a group was computed for each bimonthly interval. We  
442 modelled injury status as a function of social status or number of affiliative partners, while  
443 controlling for age and reproductive season. As group tenure and age could be correlated,  
444 we checked for collinearity between these predictors using the variance inflation factor (vif),  
445 but no correlation was found (vif = 1.01). Random effects were included for individual ID -  
446 to account for repeated measures - and for the specific bimonthly interval within the study  
447 period. We z-scored continuous variables to help convergence and tested interaction terms  
448 among all our predictors, which were retained if significant.

#### 449 **Mechanism #2: Sociality influences the survival of injured animals**

450 To examine the effect of sociality (social status and number of affiliative partners on the  
451 survival of injured animals we used time-dependent cox ph models. As before, we tested for  
452 an effect of social status on survival in separate models for males and females and examined  
453 only females to test the effect of affiliative partners on survival post-injury. In all the models  
454 the predictor of interest was specified by an interaction term between injury status and the  
455 sociality measure. Variables were evaluated on a bimonthly basis with a time-dependent  
456 covariate for reproductive season. Random effects were included for individual ID and  
457 bimonthly interval. We additionally included a time-dependent fixed effect for group size to  
458 control for its potential effect on the number of kin available and on survival [2]. As some  
459 bimonthly intervals had missing information for group tenure, we ran two models for males;  
460 a complete case analysis and a model using mean-matching multiple imputation with 20  
461 iterations to fill the missing data [91, 92], yet the estimates were identical between both  
462 procedures. Given that the main predictor was an interaction term, we did not attempt to  
463 fit other interactions.

#### 464 **Post hoc mediation analysis**

465 To further confirm our findings that sociality significantly influences survival by reducing  
466 risk of injury we ran a mediation analysis. Given limitations to use mediation analyses  
467 with different type of models (logistic and cox), we translate our cox model to predict  
468 survival into a logistic regression, where the outcome represents if the animal was still alive  
469 (0) or death (1) as a function of injury status on each bimonthly interval. Unlike cox  
470 models, logistic regressions can not handle individuals for which the outcome is unknown

471 (*i.e.*, censored), therefore for those individuals the last bimonthly interval in the study was  
472 not considered. Different methods for testing mediation using logistic models have been  
473 proposed. However, to date there are still no robust methods to quantify the effect size  
474 or to consider interaction terms [61]. Given this limitation, we were only able to test the  
475 significance of the mediation effect of injury risk on the relationship between the number  
476 of affiliative partners ( $r \geq 0.125$ ) and survival. We ran first a model where the number of  
477 affiliative partners and covariates predicts the injury risk (injuries  $\sim$  sociality + covariates).  
478 From this model, we extracted the estimate and standard error for affiliative partners.  
479 Then, we ran a second model where both sociality and injury risk predict survival (survival  
480  $\sim$  sociality + injuries + covariates), and extract the estimate and standard error for injury  
481 risk. Finally, we computed the standardized element (z-score) following Iacobucci [93]. We  
482 determined significance by contrasting the z-score against a standard normal distribution,  
483 thus an absolute value greater than 1.96 represents a statistically significant mediation  
484 effect.

## 485 **Ethics**

486 This research complied with protocols approved by the Institutional Animal Care and Use  
487 Committee (IACUC) of the University of Puerto Rico (protocol no. A6850108) and by the  
488 University of Exeter School of Psychology's Ethics Committee. The Caribbean Primate  
489 Research Center (CPRC) Animal Care and Use Program is evaluated and approved by the  
490 IACUC.

## 491 **Acknowledgments**

492 We thank the CPRC for the permission to undertake research on Cayo Santiago, along  
493 with Edgar Davila, Julio Resto, Bianca Giura and Giselle Caraballo, who assisted in the  
494 collection of injury data. Additionally, we thank members of the Brent lab and CRAB for  
495 their helpful suggestions, especially Sam Ellis, Delphine De Moor, Michael Weiss, Jordan  
496 Hart and Andre Pereira. This work was supported by ANID-Chilean scholarship [num-  
497 ber 72190290], the National Institutes of Health [grant R01AG060931 to N.S.M., L.J.N.B.  
498 and J.P.H., R00AG051764 to N.S-M], a European Research Council Consolidator Grant to  
499 L.J.N.B [Friend Origins - 864461], a MacCracken Fellowship to C.M.K and a National Sci-  
500 ence Foundation Doctoral Dissertation Research Improvement Grant to C.M.K. [1919784].  
501 The CPRC is supported by the National Institutes of Health. An Animal and Biological  
502 Material Resource Center Grant [P40OD012217] was awarded to the UPR from the Office  
503 of Research Infrastructure Programs (ORIP), and a Research Facilities Construction Grant  
504 [C06OD026690] was awarded for the renovation of CPRC facilities after Hurricane Maria.

## References

- 505
- 506 [1] J. Ostner and O. Schülke, “Linking Sociality to Fitness in Primates: A Call for Mech-  
507 anisms,” *Advances in the Study of Behavior*, vol. 50, pp. 127–175, 2018.
- 508 [2] J. B. Silk, “The adaptive value of sociality in mammalian groups,” *Philosophical Trans-*  
509 *actions of the Royal Society B: Biological Sciences*, vol. 362, no. 1480, pp. 539–559,  
510 2007.
- 511 [3] N. Snyder-Mackler, J. R. Burger, L. Gaydosh, D. W. Belsky, G. A. Noppert, F. A.  
512 Campos, A. Bartolomucci, Y. C. Yang, A. E. Aiello, A. O’Rand, K. M. Harris, C. A.  
513 Shively, S. C. Alberts, and J. Tung, “Social determinants of health and survival in  
514 humans and other animals,” *Science*, vol. 368, no. 6493, p. eaax9553, 2020.
- 515 [4] E. A. Archie, J. Tung, M. Clark, J. Altmann, and S. C. Alberts, “Social affiliation  
516 matters: Both same-sex and opposite-sex relationships predict survival in wild female  
517 baboons,” *Proceedings of the Royal Society B: Biological Sciences*, vol. 281, no. 1793,  
518 2014.
- 519 [5] J. B. Silk, J. C. Beehner, T. J. Bergman, C. Crockford, A. L. Engh, L. R. Moscovice,  
520 R. M. Wittig, R. M. Seyfarth, and D. L. Cheney, “Strong and consistent social bonds  
521 enhance the longevity of female baboons,” *Current Biology*, vol. 20, pp. 1359–1361,  
522 2010.
- 523 [6] F. A. Campos, F. Villavicencio, E. A. Archie, F. Colchero, and S. C. Alberts, “Social  
524 bonds, social status and survival in wild baboons: A tale of two sexes: Social effects  
525 on survival in baboons,” *Philosophical Transactions of the Royal Society B: Biological*  
526 *Sciences*, vol. 375, no. 1811, 2020.
- 527 [7] J. Holt-Lunstad, T. B. Smith, and J. B. Layton, “Social Relationships and Mortality  
528 Risk: A Meta-analytic Review,” *PLoS Medicine*, vol. 7, no. 7, p. e1000316, 2010.
- 529 [8] S. Ellis, N. Snyder-Mackler, A. Ruiz-Lambides, M. L. Platt, and L. J. N. Brent,  
530 “Deconstructing sociality: the types of social connections that predict longevity in a  
531 group-living primate,” *Proceedings of the Royal Society B: Biological Sciences*, vol. 286,  
532 p. 20191991, dec 2019.
- 533 [9] S. Ellis, D. W. Franks, S. Natrass, M. A. Cant, M. N. Weiss, D. Giles, K. C. Balcomb,  
534 and D. P. Croft, “Mortality risk and social network position in resident killer whales:  
535 sex differences and the importance of resource abundance,” *Proceedings of the Royal*  
536 *Society B: Biological Sciences*, vol. 284, no. 1865, p. 20171313, 2017.
- 537 [10] C. M. Nuñez, J. S. Adelman, and D. I. Rubenstein, “Sociality increases juvenile survival  
538 after a catastrophic event in the feral horse (*Equus caballus*),” *Behavioral Ecology*,  
539 vol. 26, no. 1, pp. 138–147, 2015.



- 540 [11] M. A. Stanton and J. Mann, “Early Social Networks Predict Survival in Wild Bot-  
541 tlenose Dolphins,” *PLoS ONE*, vol. 7, no. 10, pp. 1–6, 2012.
- 542 [12] L. J. N. Brent, A. Ruiz-Lambides, and M. L. Platt, “Family network size and survival  
543 across the lifespan of female macaques,” *Proceedings of the Royal Society B: Biological  
544 Sciences*, vol. 284, no. 1854, p. 20170515, 2017.
- 545 [13] E. Vander Wal, F. M. van Beest, and R. K. Brook, “Density-Dependent Effects on  
546 Group Size Are Sex-Specific in a Gregarious Ungulate,” *PLoS ONE*, vol. 8, no. 1,  
547 p. e53777, 2013.
- 548 [14] G. E. Blomquist, D. S. Sade, and J. D. Berard, “Rank-Related Fitness Differences  
549 and Their Demographic Pathways in Semi-Free-Ranging Rhesus Macaques (*Macaca  
550 mulatta*),” *International Journal of Primatology*, vol. 32, no. 1, pp. 193–208, 2011.
- 551 [15] S. Stringhini, C. Carmeli, M. Jokela, M. Avendaño, P. Muennig, F. Guida, F. Ricceri,  
552 A. D’Errico, H. Barros, M. Bochud, M. Chadeau-Hyam, F. Clavel-Chapelon, G. Costa,  
553 C. Delpierre, S. Fraga, M. Goldberg, G. G. Giles, V. Krogh, M. Kelly-Irving, R. Layte,  
554 A. M. Lasserre, M. G. Marmot, M. Preisig, M. J. Shipley, P. Vollenweider, M. Zins,  
555 I. Kawachi, A. Steptoe, J. P. Mackenbach, P. Vineis, M. Kivimäki, H. Alenius, M. Aven-  
556 dano, H. Barros, M. Bochud, C. Carmeli, L. Carra, R. Castagné, M. Chadeau-Hyam,  
557 F. Clavel-Chapelon, G. Costa, E. Courtin, C. Delpierre, A. D’Errico, P.-A. Dugué,  
558 P. Elliott, S. Fraga, V. Gares, G. Giles, M. Goldberg, D. Greco, A. Hodge, M. K. Ir-  
559 ving, P. Karisola, M. Kivimäki, V. Krogh, T. Lang, R. Layte, B. Lepage, J. Mackenbach,  
560 M. Marmot, C. McCrory, R. Milne, P. Muennig, W. Nusselder, S. Panico, D. Petrovic,  
561 S. Polidoro, M. Preisig, O. Raitakari, A. I. Ribeiro, A. I. Ribeiro, F. Ricceri, O. Robin-  
562 son, J. R. Valverde, C. Sacerdote, R. Satolli, G. Severi, M. J. Shipley, S. Stringhini,  
563 R. Tumino, P. Vineis, P. Vollenweider, and M. Zins, “Socioeconomic status and the  
564 25 × 25 risk factors as determinants of premature mortality: a multicohort study  
565 and meta-analysis of 1.7 million men and women,” *The Lancet*, vol. 389, no. 10075,  
566 pp. 1229–1237, 2017.
- 567 [16] D. L. Cram, P. Monaghan, R. Gillespie, B. Dantzer, C. Duncan, H. Spence-Jones, and  
568 T. Clutton-Brock, “Rank-Related Contrasts in Longevity Arise from Extra-Group Ex-  
569 cursions Not Delayed Senescence in a Cooperative Mammal,” *Current Biology*, vol. 28,  
570 no. 18, pp. 2934–2939.e4, 2018.
- 571 [17] D. Von Holst, H. Hutzelmeyer, P. Kaetzke, M. Khaschei, and R. Schönheiter, “Social  
572 rank, stress, fitness, and life expectancy in wild rabbits,” *Naturwissenschaften*, vol. 86,  
573 no. 8, pp. 388–393, 1999.
- 574 [18] K. E. Holekamp and E. D. Strauss, “Aggression and dominance: an interdisciplinary  
575 overview,” *Current Opinion in Behavioral Sciences*, vol. 12, pp. 44–51, 2016.

- 576 [19] T. H. Clutton-Brock and E. Huchard, “Social competition and selection in males and fe-  
577 males,” *Philosophical Transactions of the Royal Society B: Biological Sciences*, vol. 368,  
578 no. 1631, p. 20130074, 2013.
- 579 [20] L. Samuni, A. Preis, A. Mielke, T. Deschner, R. M. Wittig, and C. Crockford, “Social  
580 bonds facilitate cooperative resource sharing in wild chimpanzees,” *Proceedings of the*  
581 *Royal Society B: Biological Sciences*, vol. 285, no. 1888, p. 20181643, 2018.
- 582 [21] G. S. Wilkinson, “Reciprocal food sharing in the vampire bat,” *Nature*, vol. 308,  
583 no. 5955, pp. 181–184, 1984.
- 584 [22] A. R. Hoelzel, “Killer whale predation on marine mammals at Punta Norte, Argentina;  
585 food sharing, provisioning and foraging strategy,” *Behavioral Ecology and Sociobiology*,  
586 vol. 29, pp. 197–204, oct 1991.
- 587 [23] T. Simila and F. Ugarte, “Surface and underwater observations of cooperatively feed-  
588 ing killer whales in northern Norway,” *Canadian Journal of Zoology*, vol. 71, no. 8,  
589 pp. 1494–1499, 1993.
- 590 [24] K. A. Rossbach, “Cooperative feeding among bottlenose dolphins ( *Tursiops truncatus*  
591 ) near Grand Bahama Island , Bahamas,” *Aquatic Mammals*, vol. 25, pp. 163–167,  
592 1999.
- 593 [25] C. Dubuc, K. D. Hughes, J. Cascio, and L. R. Santos, “Social tolerance in a despotic pri-  
594 mate: Co-feeding between consortship partners in rhesus macaques,” *American Journal*  
595 *of Physical Anthropology*, vol. 148, no. 1, pp. 73–80, 2012.
- 596 [26] F. B. M. de Waal, K. Leimgruber, and A. R. Greenberg, “Giving is self-rewarding for  
597 monkeys,” *Proceedings of the National Academy of Sciences*, vol. 105, no. 36, pp. 13685–  
598 13689, 2008.
- 599 [27] M. S. De Villiers, P. R. Richardson, and A. S. Van Jaarsveld, “Patterns of coalition  
600 formation and spatial association in a social carnivore, the African wild dog (*Lycaon*  
601 *pictus*),” *Journal of Zoology*, vol. 260, no. 4, pp. 377–389, 2003.
- 602 [28] C. Feh, “Alliances and reproductive success in Camargue stallions,” *Animal Behaviour*,  
603 vol. 57, no. 3, pp. 705–713, 1999.
- 604 [29] O. Schülke, J. Bhagavatula, L. Vigilant, and J. Ostner, “Social bonds enhance repro-  
605 ductive success in male macaques,” *Current Biology*, vol. 20, no. 24, pp. 2207–2210,  
606 2010.
- 607 [30] C. Young, B. Majolo, O. Schülke, and J. Ostner, “Male social bonds and rank pre-  
608 dict supporter selection in cooperative aggression in wild Barbary macaques,” *Animal*  
609 *Behaviour*, vol. 95, pp. 23–32, 2014.

- 610 [31] J. T. Feldblum, C. Krupenye, J. Bray, A. E. Pusey, and I. C. Gilby, “Social bonds  
611 provide multiple pathways to reproductive success in wild male chimpanzees,” *iScience*,  
612 vol. 24, no. 8, p. 102864, 2021.
- 613 [32] J. B. Silk, S. C. Alberts, and J. Altmann, “Patterns of coalition formation by adult  
614 female baboons in Amboseli, Kenya,” *Animal Behaviour*, vol. 67, no. 3, pp. 573–582,  
615 2004.
- 616 [33] J. B. Silk, “Altruism Among Female *Macaca Radiata*: Explanations and Analysis of  
617 Patterns of Grooming and Coalition Formation,” *Behaviour*, vol. 79, pp. 162–188, 1982.
- 618 [34] B. Chapais, C. Gauthier, J. Prud’Homme, and P. Vasey, “Relatedness threshold for  
619 nepotism in Japanese macaques,” *Animal Behaviour*, vol. 53, no. 5, pp. 1089–1101,  
620 1997.
- 621 [35] N. Snyder-Mackler, J. Sanz, J. N. Kohn, J. F. Brinkworth, S. Morrow, A. O. Shaver,  
622 J.-C. Grenier, R. Pique-Regi, Z. P. Johnson, M. E. Wilson, L. B. Barreiro, and J. Tung,  
623 “Social status alters immune regulation and response to infection in macaques,” *Sci-  
624 ence*, vol. 354, no. 6315, pp. 1041–1045, 2016.
- 625 [36] J. Tung, L. B. Barreiro, Z. P. Johnson, K. D. Hansen, V. Michopoulos, D. Toufexis,  
626 K. Micheli, M. E. Wilson, and Y. Gilad, “Social environment is associated with  
627 gene regulatory variation in the rhesus macaque immune system,” *Proceedings of the  
628 National Academy of Sciences*, vol. 109, no. 17, pp. 6490–6495, 2012.
- 629 [37] E. A. Archie, J. Altmann, and S. C. Alberts, “Social status predicts wound healing in  
630 wild baboons,” *Proceedings of the National Academy of Sciences of the United States  
631 of America*, vol. 109, no. 23, pp. 9017–9022, 2012.
- 632 [38] R. M. Sapolsky, “Social Status and Health in Humans and Other Animals,” *Annual  
633 Review of Anthropology*, vol. 33, no. 1, pp. 393–418, 2004.
- 634 [39] R. M. Sapolsky, “The Influence of Social Hierarchy on Primate Health,” *Science*,  
635 vol. 308, no. 5722, pp. 648–652, 2005.
- 636 [40] A. V. Jaeggi and M. Gurven, “Natural cooperators: Food sharing in humans and other  
637 primates,” *Evolutionary Anthropology*, vol. 22, no. 4, pp. 186–195, 2013.
- 638 [41] J. R. Stevens and I. C. Gilby, “A conceptual framework for nonkin food sharing: Timing  
639 and currency of benefits,” *Animal Behaviour*, vol. 67, no. 4, pp. 603–614, 2004.
- 640 [42] M. Y. Akinyi, J. Tung, M. Jeneby, N. B. Patel, J. Altmann, and S. C. Alberts, “Role  
641 of grooming in reducing tick load in wild baboons (*Papio cynocephalus*),” *Animal  
642 Behaviour*, vol. 85, no. 3, pp. 559–568, 2013.
- 643 [43] A. Pérez Pérez and J. J. Veà, “Allogrooming behavior in *Cercocebus torquatus*: The  
644 case for the hygienic functional hypothesis,” *Primates*, vol. 41, pp. 199–207, apr 2000.

- 645 [44] J. A. Anderson, A. J. Lea, T. N. Voyles, M. Y. Akinyi, R. Nyakundi, L. Ochola,  
646 M. Omondi, F. Nyundo, Y. Zhang, F. A. Campos, S. C. Alberts, E. A. Archie, and  
647 J. Tung, “Distinct gene regulatory signatures of dominance rank and social bond  
648 strength in wild baboons,” *bioRxiv*, p. 2021.05.31.446340, 2021.
- 649 [45] M. A. Pavez-Fox, J. E. Negron-Del Valle, I. J. Thompson, C. S. Walker, S. E. Bauman,  
650 O. Gonzalez, N. Compo, A. Ruiz-Lambides, M. I. Martinez, M. L. Platt, M. J. Mon-  
651 tague, J. P. Higham, N. Snyder-Mackler, and L. J. Brent, “Sociality predicts individual  
652 variation in the immunity of free-ranging rhesus macaques,” *Physiology & Behavior*,  
653 vol. 241, no. November, p. 113560, 2021.
- 654 [46] B. Thierry, “Social epigenesis,” in *Macaque Societies* (B. Thierry, M. Singh, and  
655 W. Kaumanns, eds.), pp. 267–290, Cambridge: Cambridge University Press, 2004.
- 656 [47] L. J. N. Brent, A. MacLarnon, M. L. Platt, and S. Semple, “Seasonal changes in the  
657 structure of rhesus macaque social networks,” *Behavioral Ecology and Sociobiology*,  
658 vol. 67, no. 3, pp. 349–359, 2013.
- 659 [48] J. H. Manson, “Male aggression: a cost of female choice in rhesus macaque,” 1994.
- 660 [49] J. P. Higham, M. Heistermann, and D. Maestriperi, “The energetics of male-male en-  
661 durance rivalry in free-ranging rhesus macaques, *Macaca mulatta*,” *Animal Behaviour*,  
662 vol. 81, no. 5, pp. 1001–1007, 2011.
- 663 [50] J. P. Higham and D. Maestriperi, “The Costs of Reproductive Success in Male Rhesus  
664 Macaques (*Macaca mulatta*) on Cayo Santiago,” *International Journal of Primatology*,  
665 vol. 35, no. 3-4, pp. 661–676, 2014.
- 666 [51] R. M. Wittig, C. Crockford, A. Weltring, K. E. Langergraber, T. Deschner, and  
667 K. Zuberbühler, “Social support reduces stress hormone levels in wild chimpanzees  
668 across stressful events and everyday affiliations,” *Nature Communications*, vol. 7, no. 1,  
669 p. 13361, 2016.
- 670 [52] T. Therneau, “Using Time Dependent Covariates and Time Dependent Coefficients in  
671 the Cox Model,” *R package Survival Vignettes*, pp. 1–8, 2012.
- 672 [53] T. Therneau, “coxme: Mixed Effects Cox Models. R package version 2.2-16.,” *Cran*,  
673 2020.
- 674 [54] J. H. Manson, “Do female rhesus macaques choose novel males?,” *American Journal*  
675 *of Primatology*, vol. 37, no. 4, pp. 285–296, 1995.
- 676 [55] C. Dubuc, S. Winters, W. L. Allen, L. J. N. Brent, J. Cascio, D. Maestriperi, A. V.  
677 Ruiz-Lambides, A. Widdig, and J. P. Higham, “Sexually selected skin colour is heritable  
678 and related to fecundity in a non-human primate,” *Proceedings of the Royal Society B:*  
679 *Biological Sciences*, vol. 281, no. 1794, p. 20141602, 2014.

- 680 [56] C. M. Kimock, C. Dubuc, L. J. N. Brent, and J. P. Higham, “Male morphological traits  
681 are heritable but do not predict reproductive success in a sexually-dimorphic primate,”  
682 *Scientific Reports*, vol. 9, no. 1, p. 19794, 2019.
- 683 [57] F. B. Bercovitch, “Reproductive strategies of rhesus macaques,” *Primates*, vol. 38,  
684 no. 3, pp. 247–263, 1997.
- 685 [58] A. Widdig, P. Nurnberg, M. Krawczak, W. J. Streich, and F. B. Bercovitch, “Paternal  
686 relatedness and age proximity regulate social relationships among adult female rhesus  
687 macaques,” *Proceedings of the National Academy of Sciences*, vol. 98, no. 24, pp. 13769–  
688 13773, 2001.
- 689 [59] L. J. N. Brent, S. R. Heilbronner, J. E. Horvath, J. Gonzalez-Martinez, A. Ruiz-  
690 Lambides, A. G. Robinson, J. H. P. Skene, and M. L. Platt, “Genetic origins of social  
691 networks in rhesus macaques,” *Scientific Reports*, vol. 3, p. 1042, dec 2013.
- 692 [60] T. J. VanderWeele, “Mediation Analysis: A Practitioner’s Guide,” *Annual Review of*  
693 *Public Health*, vol. 37, pp. 17–32, 2016.
- 694 [61] J. J. Rijnhart, J. W. Twisk, I. Eekhout, and M. W. Heymans, “Comparison of logistic-  
695 regression based methods for simple mediation analysis with a dichotomous outcome  
696 variable,” *BMC Medical Research Methodology*, vol. 19, no. 1, pp. 1–10, 2019.
- 697 [62] M. E. Arlet, J. R. Carey, and F. Molleman, “Species, age and sex differences in type  
698 and frequencies of injuries and impairments among four arboreal primate species in  
699 Kibale National Park, Uganda,” *Primates*, vol. 50, no. 1, pp. 65–73, 2009.
- 700 [63] E. A. Archie, J. Altmann, and S. C. Alberts, “Costs of reproduction in a long-lived  
701 female primate: Injury risk and wound healing,” *Behavioral Ecology and Sociobiology*,  
702 vol. 68, no. 7, pp. 1183–1193, 2014.
- 703 [64] H. A. MacCormick, D. R. MacNulty, A. L. Bosacker, C. Lehman, A. Bailey, D. Anthony  
704 Collins, and C. Packer, “Male and female aggression: lessons from sex, rank, age, and  
705 injury in olive baboons,” *Behavioral Ecology*, vol. 23, pp. 684–691, may 2012.
- 706 [65] C. Drews, “Contexts and Patterns of Injuries in Free-Ranging Male Baboons (*Papio*  
707 *Cynocephalus*),” *Behaviour*, vol. 133, pp. 443–474, 1996.
- 708 [66] J. A. Feder, A. Lu, A. Koenig, and C. Borries, “The costs of competition: injury  
709 patterns in 2 Asian colobine monkeys,” *Behavioral Ecology*, vol. 30, no. 5, pp. 1242–  
710 1253, 2019.
- 711 [67] R. M. Petersen, M. Heistermann, and J. P. Higham, “Social and sexual behaviors  
712 predict immune system activation, but not adrenocortical activation, in male rhesus  
713 macaques,” *Behavioral Ecology and Sociobiology*, vol. 75, no. 12, 2021.

- 714 [68] M. L. East, E. Otto, J. Helms, D. Thierer, J. Cable, and H. Hofer, “Does lactation  
715 lead to resource allocation trade-offs in the spotted hyaena?,” *Behavioral Ecology and*  
716 *Sociobiology*, vol. 69, no. 5, pp. 805–814, 2015.
- 717 [69] L. Kulik, F. Amici, D. Langos, and A. Widdig, “Sex Differences in the Development  
718 of Aggressive Behavior in Rhesus Macaques (*Macaca mulatta*),” *International Journal*  
719 *of Primatology*, vol. 36, no. 4, pp. 764–789, 2015.
- 720 [70] J. Altmann, L. Gesquiere, J. Galbany, P. O. Onyango, and S. C. Alberts, “Life history  
721 context of reproductive aging in a wild primate model,” vol. 1204, pp. 127–138, 2010.
- 722 [71] I. S. Bernstein and C. L. Ehhardt, “Age-sex differences in the expression of agonistic be-  
723 havior in rhesus monkey (*Macaca mulatta*) groups.,” *Journal of comparative psychology*  
724 (*Washington, D.C. : 1983*), vol. 99, pp. 115–132, 1985.
- 725 [72] S. A. Cavigelli and M. J. Caruso, “Sex, social status and physiological stress in pri-  
726 mates: the importance of social and glucocorticoid dynamics,” *Philosophical Trans-*  
727 *actions of the Royal Society B: Biological Sciences*, vol. 370, no. 1669, p. 20140103,  
728 2015.
- 729 [73] L. R. Gesquiere, N. H. Learn, M. C. M. Simao, P. O. Onyango, S. C. Alberts, and  
730 J. Altmann, “Life at the Top: Rank and Stress in Wild Male Baboons,” *Science*,  
731 vol. 333, no. 6040, pp. 357–360, 2011.
- 732 [74] C. Fichtel, A. V. Schnoell, and P. M. Kappeler, “Measuring social tolerance: An ex-  
733 perimental approach in two lemurid primates,” *Ethology*, vol. 124, pp. 65–73, jan 2018.
- 734 [75] F. E. de Oliveira Terceiro, M. d. F. Arruda, C. P. van Schaik, A. Araújo, and J. M.  
735 Burkart, “Higher social tolerance in wild versus captive common marmosets: the role  
736 of interdependence,” *Scientific Reports*, vol. 11, no. 1, p. 825, 2021.
- 737 [76] S. Guo and L. DiPietro, “Factors Affecting Wound Healing,” *Journal of Dental Re-*  
738 *search*, vol. 89, pp. 219–229, mar 2010.
- 739 [77] L. J. Brent, S. W. Chang, J.-F. Gariépy, and M. L. Platt, “The neuroethology of  
740 friendship,” *Annals of the New York Academy of Sciences*, vol. 1316, pp. 1–17, may  
741 2014.
- 742 [78] J. Micheletta, B. M. Waller, M. R. Panggur, C. Neumann, J. Duboscq, M. Agil, and  
743 A. Engelhardt, “Social bonds affect anti-predator behaviour in a tolerant species of  
744 macaque, *Macaca nigra*,” vol. 279, no. 1744, pp. 4042–4050, 2012.
- 745 [79] J. M. Kern and A. N. Radford, “Social-bond strength influences vocally mediated  
746 recruitment to mobbing,” *Biology letters*, vol. 12, no. 11, 2016.
- 747 [80] D. Páez-Rosas, L. Vaca, R. Pepolas, R. Wollocombe, T. De Roy, and G. Rivas-Torres,  
748 “Hunting and cooperative foraging behavior of Galapagos sea lion: An attack to large  
749 pelagics,” *Marine Mammal Science*, vol. 36, no. 1, pp. 386–391, 2020.



- 750 [81] L. A. Campbell, P. J. Tkaczynski, J. Lehmann, M. Mouna, and B. Majolo, “Social ther-  
751 moregulation as a potential mechanism linking sociality and fitness: Barbary macaques  
752 with more social partners form larger huddles,” *Scientific Reports*, vol. 8, no. 1, pp. 1–8,  
753 2018.
- 754 [82] M. J. Kessler and R. G. Rawlins, “A 75-year pictorial history of the Cayo Santiago  
755 rhesus monkey colony,” *American Journal of Primatology*, vol. 78, no. 1, pp. 6–43,  
756 2016.
- 757 [83] R. Hernandez-Pacheco, D. L. Delgado, R. G. Rawlins, M. J. Kessler, A. V. Ruiz-  
758 Lambides, E. Maldonado, and A. M. Sabat, “Managing the Cayo Santiago rhesus  
759 macaque population: The role of density,” *American Journal of Primatology*, vol. 78,  
760 no. 1, pp. 167–181, 2016.
- 761 [84] J. Berard, “A four-year study of the association between male dominance rank, resi-  
762 dency status, and reproductive activity in rhesus macaques (*Macaca mulatta*),” *Pri-  
763 mates*, vol. 40, no. 1, pp. 159–175, 1999.
- 764 [85] D. Chikazawa, T. P. Gordon, C. A. Bean, and I. S. Bernstein, “Mother-daughter domi-  
765 nance reversals in rhesus monkeys (*Macaca mulatta*),” *Primates*, vol. 20, no. 2, pp. 301–  
766 305, 1979.
- 767 [86] L. J. Brent, A. Ruiz-Lambides, and M. L. Platt, “Persistent social isolation reflects  
768 identity and social context but not maternal effects or early environment,” *Scientific  
769 Reports*, vol. 7, no. 1, pp. 1–11, 2017.
- 770 [87] S. Madlon-Kay, L. Brent, M. Montague, K. Heller, and M. Platt, “Using Machine  
771 Learning to Discover Latent Social Phenotypes in Free-Ranging Macaques,” *Brain  
772 Sciences*, vol. 7, no. 12, p. 91, 2017.
- 773 [88] H. Akoglu, “User’s guide to correlation coefficients,” *Turkish Journal of Emergency  
774 Medicine*, vol. 18, no. 3, pp. 91–93, 2018.
- 775 [89] D. De Moor, C. Roos, J. Ostner, and O. Schülke, “Bonds of bros and brothers: Kinship  
776 and social bonding in postdispersal male macaques,” *Molecular Ecology*, vol. 29, no. 17,  
777 pp. 3346–3360, 2020.
- 778 [90] E. Kapsalis and C. Berman, “Models of Affiliative Relationships among Free-Ranging  
779 Rhesus Monkeys (*Macaca mulatta*) II. Testing Predictions for Three Hypothesized  
780 Organizing Principles Author ( s ): Ellen Kapsalis and Carol M . Berman Published  
781 by : Brill Stable URL : <http://www.j>,” *Behaviour*, vol. 133, pp. 1235–1263, 1996.
- 782 [91] S. van Buuren and K. Groothuis-Oudshoorn, “mice : Multivariate Imputation by  
783 Chained Equations in R,” *Journal of Statistical Software*, vol. 45, pp. 1–67, 2011.

- 784 [92] A. Marshall, D. G. Altman, and R. L. Holder, “Comparison of imputation methods  
785 for handling missing covariate data when fitting a Cox proportional hazards model: a  
786 resampling study,” *BMC Medical Research Methodology*, vol. 10, no. 1, p. 112, 2010.
- 787 [93] D. Iacobucci, “Mediation analysis and categorical variables: The final frontier,” *Journal*  
788 *of Consumer Psychology*, vol. 22, no. 4, pp. 582–594, 2012.

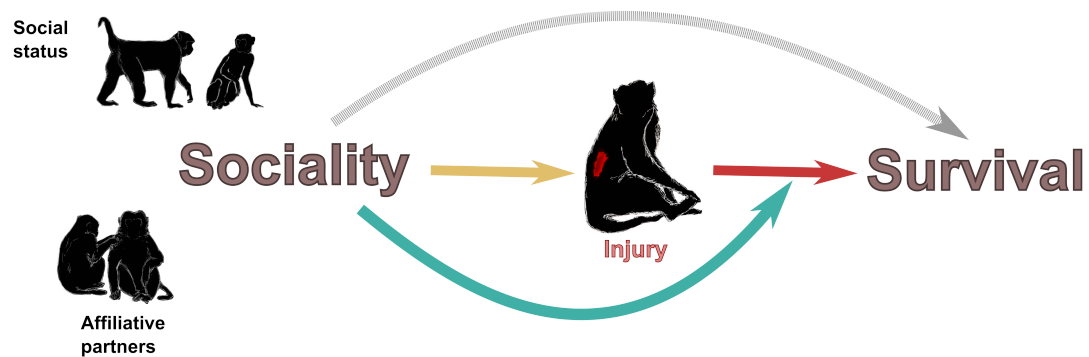

Figure 1: Injury-related mechanisms by which components of sociality (social status, affiliative partners) can influence survival. A direct effect of sociality on survival (gray arrow) has been well established in mammals [4, 5, 7, 10, 11], including studies in the Cayo Santiago population [12, 8]. We explore mechanisms related to injury by which the relationship between sociality and survival might come about. According to the first mechanism, sociality influences the risk of injury (**yellow arrow**) and, therefore, survival (**red arrow**). According to the second mechanism (**green arrow**), sociality affects the survival trajectories of injured individuals.

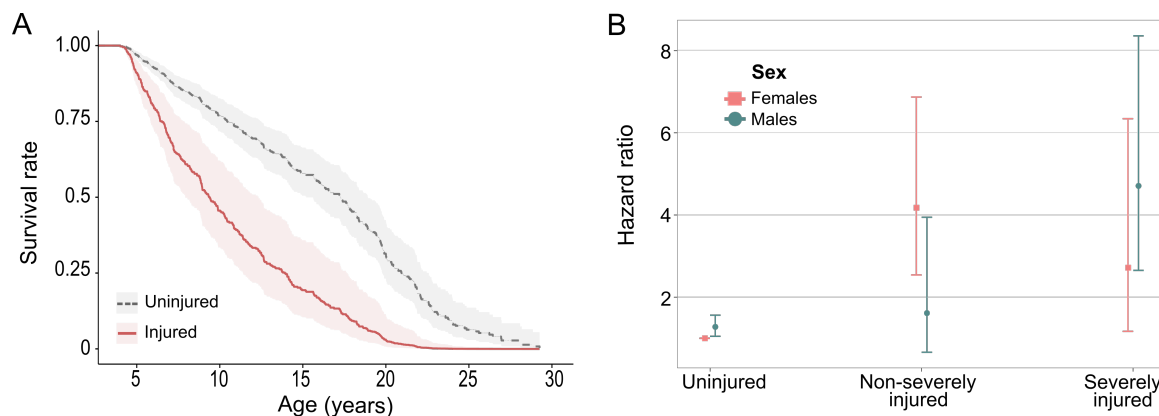

Figure 2: Effect of injuries on survival. **A**) Survival curves adjusted for covariates for injured and uninjured individuals. Injured individuals (red solid line,  $n = 571$ , 294 females, 277 males) had near a 3-fold increase in the probability of dying compared to uninjured animals (gray dashed line,  $n = 1030$ , 557 females, 473 males) ( $H_z = 1.06 \pm 0.17$ ,  $z = 6.58$ ,  $p < 0.01$ , injuries (i) = 1041, deaths (d) = 443). Curves represent males during the mating season, but those for females were similar. Shaded areas represent standard errors. **B**) Hazard ratios of death for females and males as a function of the severity of injuries. Severe injuries increased the hazard of death relative to non-severe injuries in males (green circles,  $n$  uninjured = 473,  $n$  non-severely injured = 189,  $n$  severely injured = 251), but not in females (Pink squares,  $n$  uninjured = 557,  $n$  non-severely injured = 232,  $n$  severely injured = 147) ( $H_z$  severity\*sexM =  $1.46 \pm 0.72$ ,  $z = 2.02$ ,  $p = 0.04$ , i = 398, d = 107).

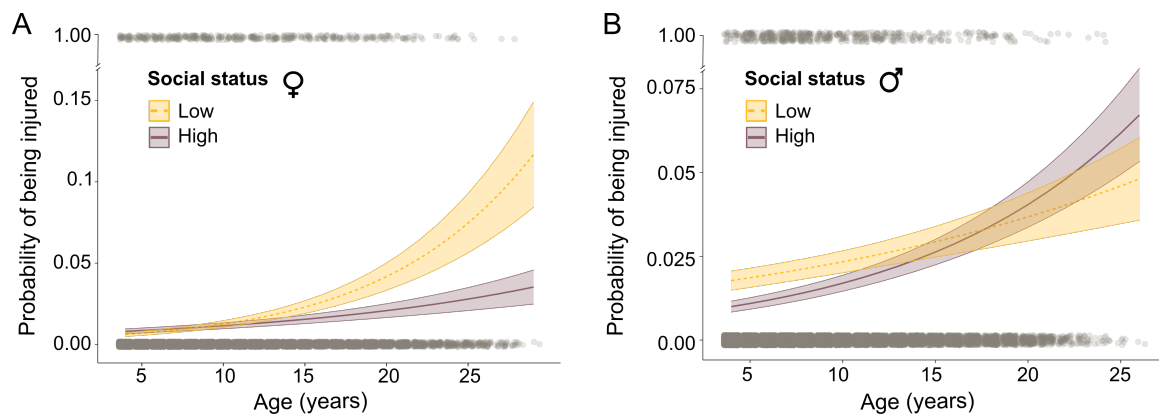

Figure 3: Predicted injury risk in relation to social status. **A**) Injury risk for females as a function of social status and age. Low status females (yellow dashed line,  $n = 420$ , 237 injuries) had higher chances of being injured than high status females (purple solid line,  $n = 407$ , 211 injuries), with increasing probabilities for older females (Odds rankLow\*age =  $0.3 \pm 0.1$ ,  $z = 3.02$ ,  $p < 0.01$ ). **B**) Injury risk for males as a function of social status and age. For visualization, social status was categorized by selecting the 20th (273 days of tenure) and 80th (2029 days of tenure) percentiles depicting low status (yellow dashed line) and high status (purple solid line), respectively ( $n = 748$ , 536 injuries). Younger males from low status had higher injury risk than high status young males, yet the opposite occurred at later ages (Odds tenure\*age =  $0.1 \pm 0.03$ ,  $z = 3.28$ ,  $p < 0.01$ ). In both plots, shaded areas represent standard errors and gray dots the raw data used in the models (top: injured, bottom: uninjured).

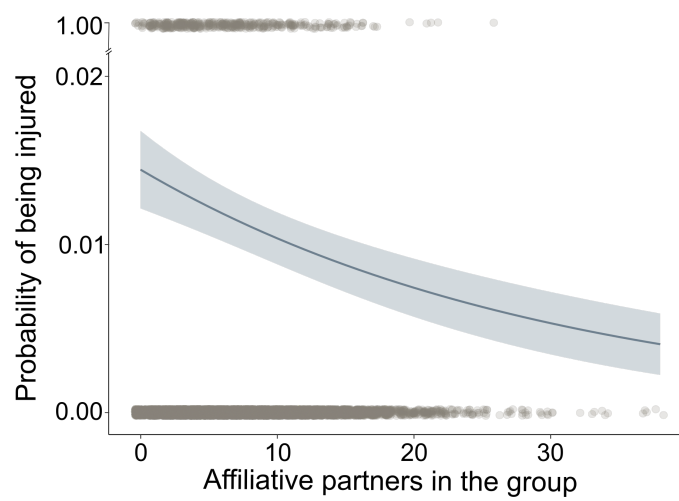

Figure 4: Predicted injury risk as a function of the number affiliative partners. X-axis represents the number of female relatives (extended family,  $r \geq 0.125$ ) present in a female's group ( $n = 851$ , injuries ( $i$ ) = 491). Females with more relatives had lower chances of suffering from an injury compared to females with fewer relatives (Odds =  $-0.14 \pm 0.06$ ,  $z = -2.5$ ,  $p = 0.01$ ,  $i = 491$ ). Shaded areas represent standard errors and gray dots the raw data used in the models (top: injured, bottom: uninjured).
